# Supplementary material for: A model system for assessing and comparing the ability of exon microarray and tag sequencing to detect genes specific for malignant B-cells
Source: PubMed Central journal article supplement (PMC3505742; doi:10.1186/1471-2164-13-596), 2012-11-05

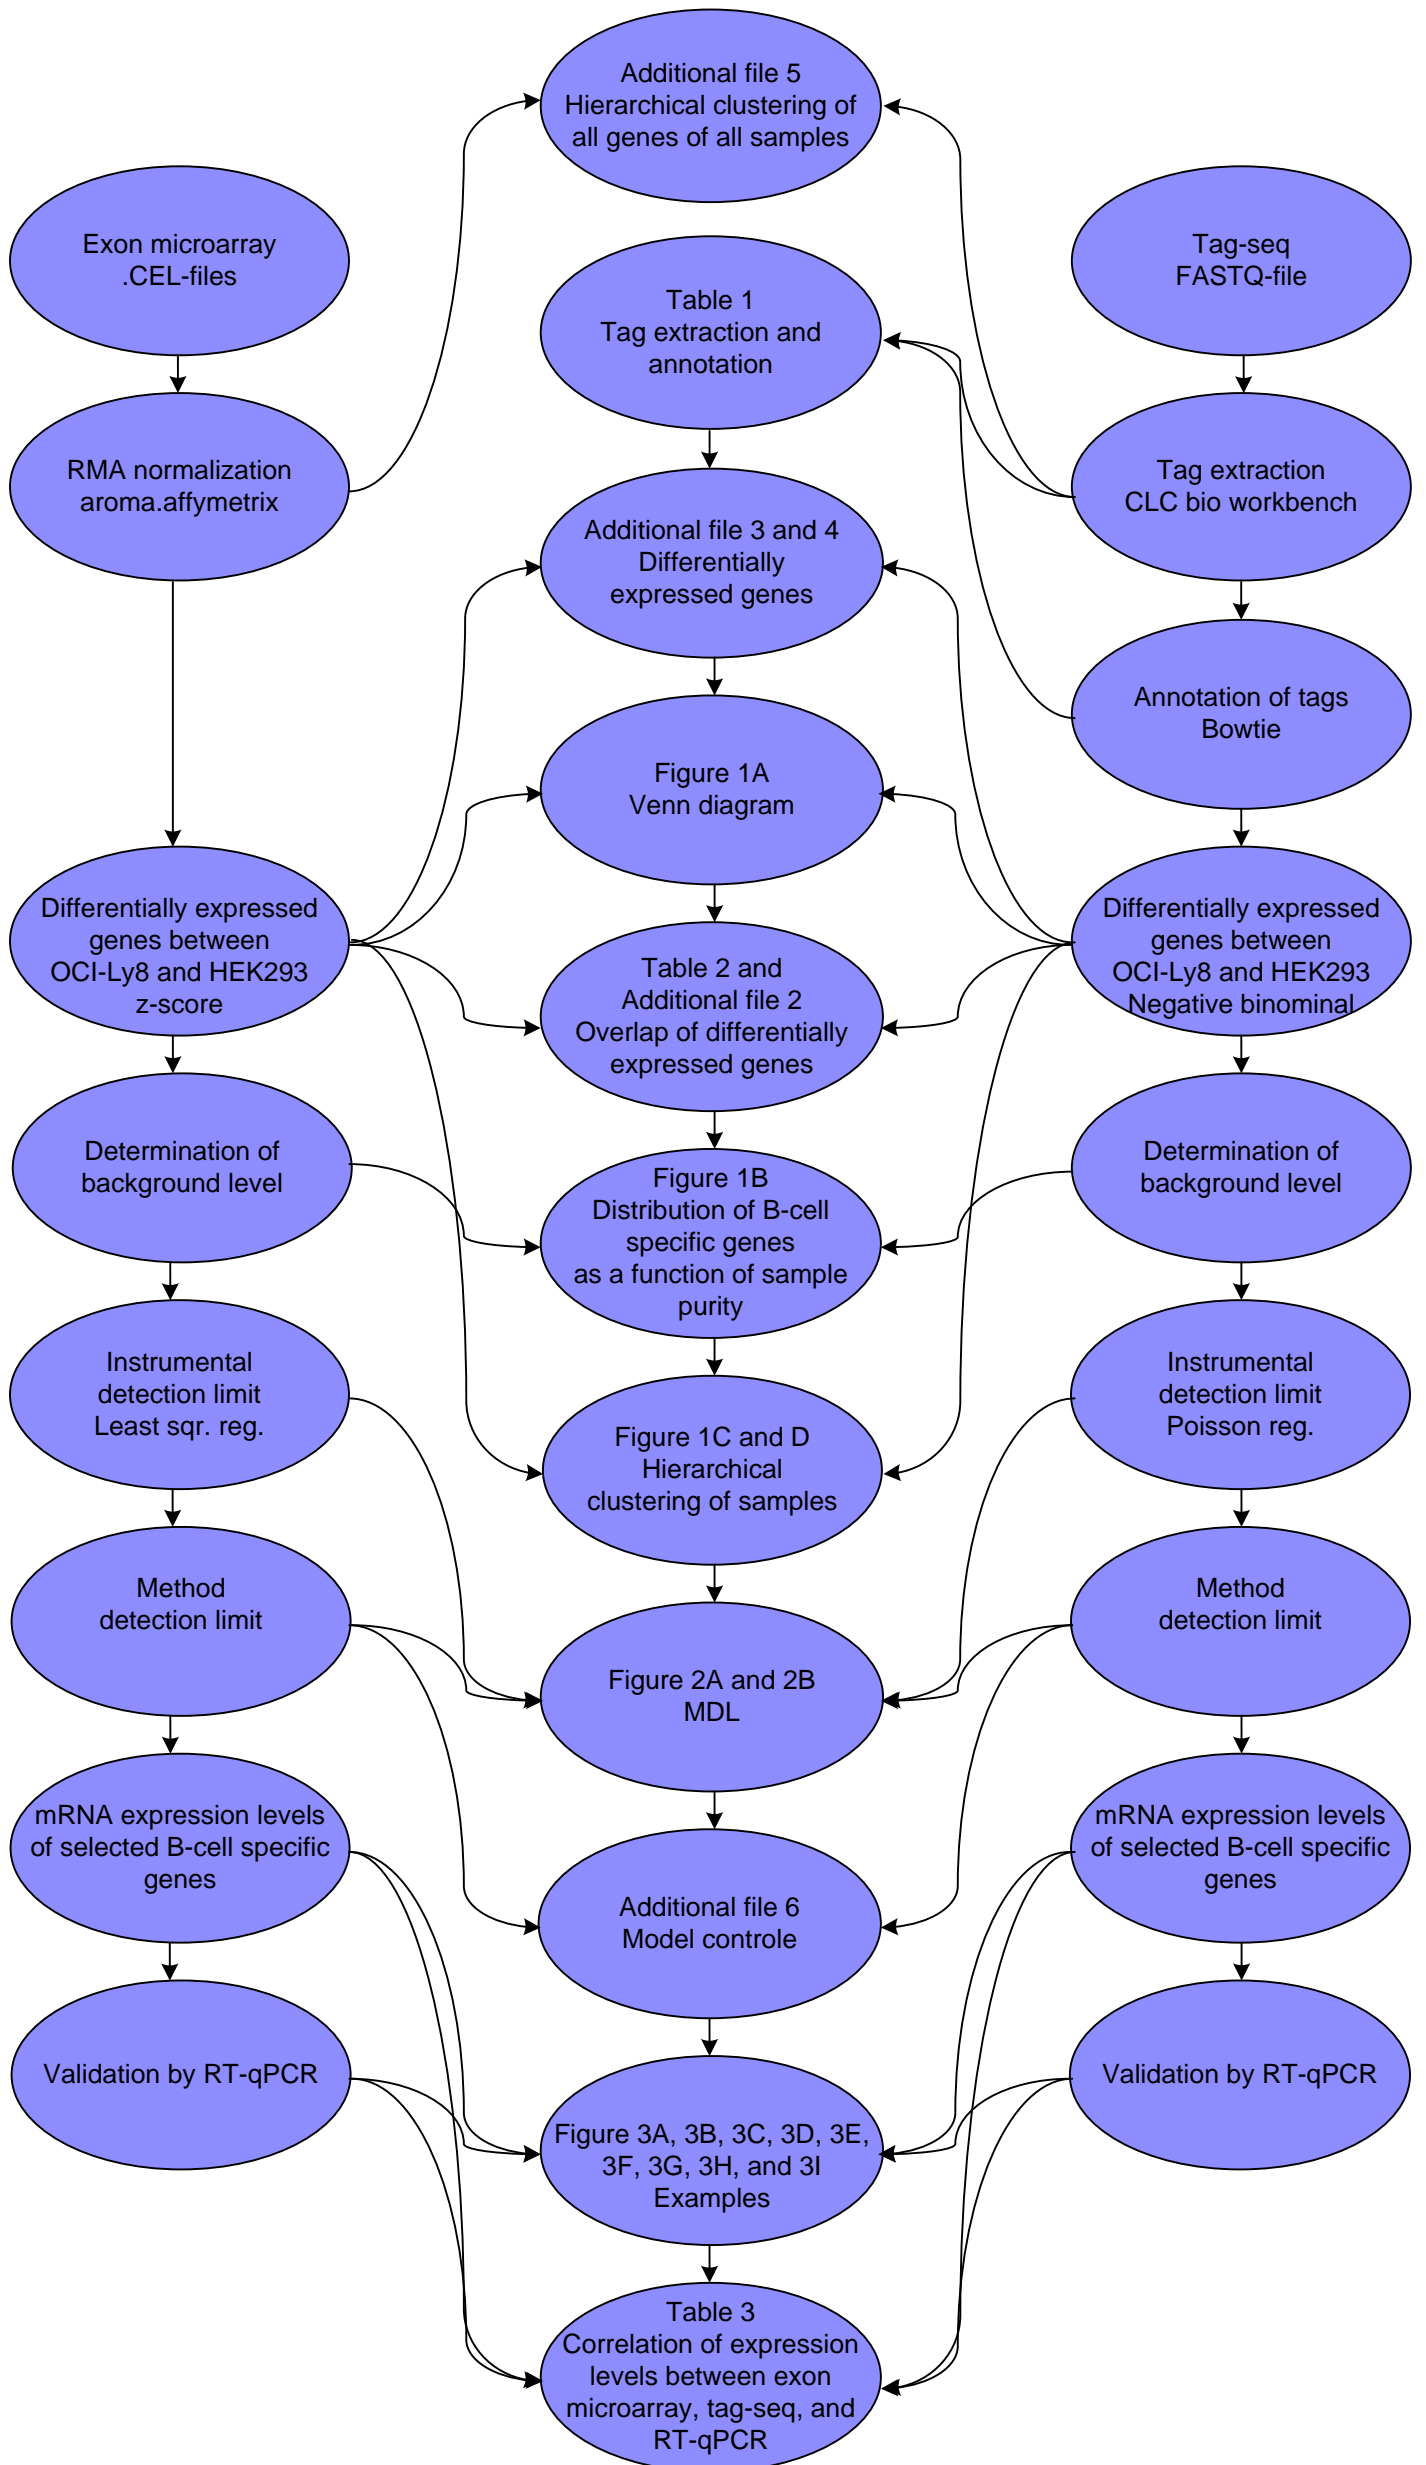

Supplement: 1471-2164-13-596-S1.pdf [file 1471-2164-13-596-S1.pdf]
