# Supplementary material for: A model system for assessing and comparing the ability of exon microarray and tag sequencing to detect genes specific for malignant B-cells
Source: PubMed Central journal article supplement (PMC3505742; doi:10.1186/1471-2164-13-596), 2012-11-05

# Correspondence Curve

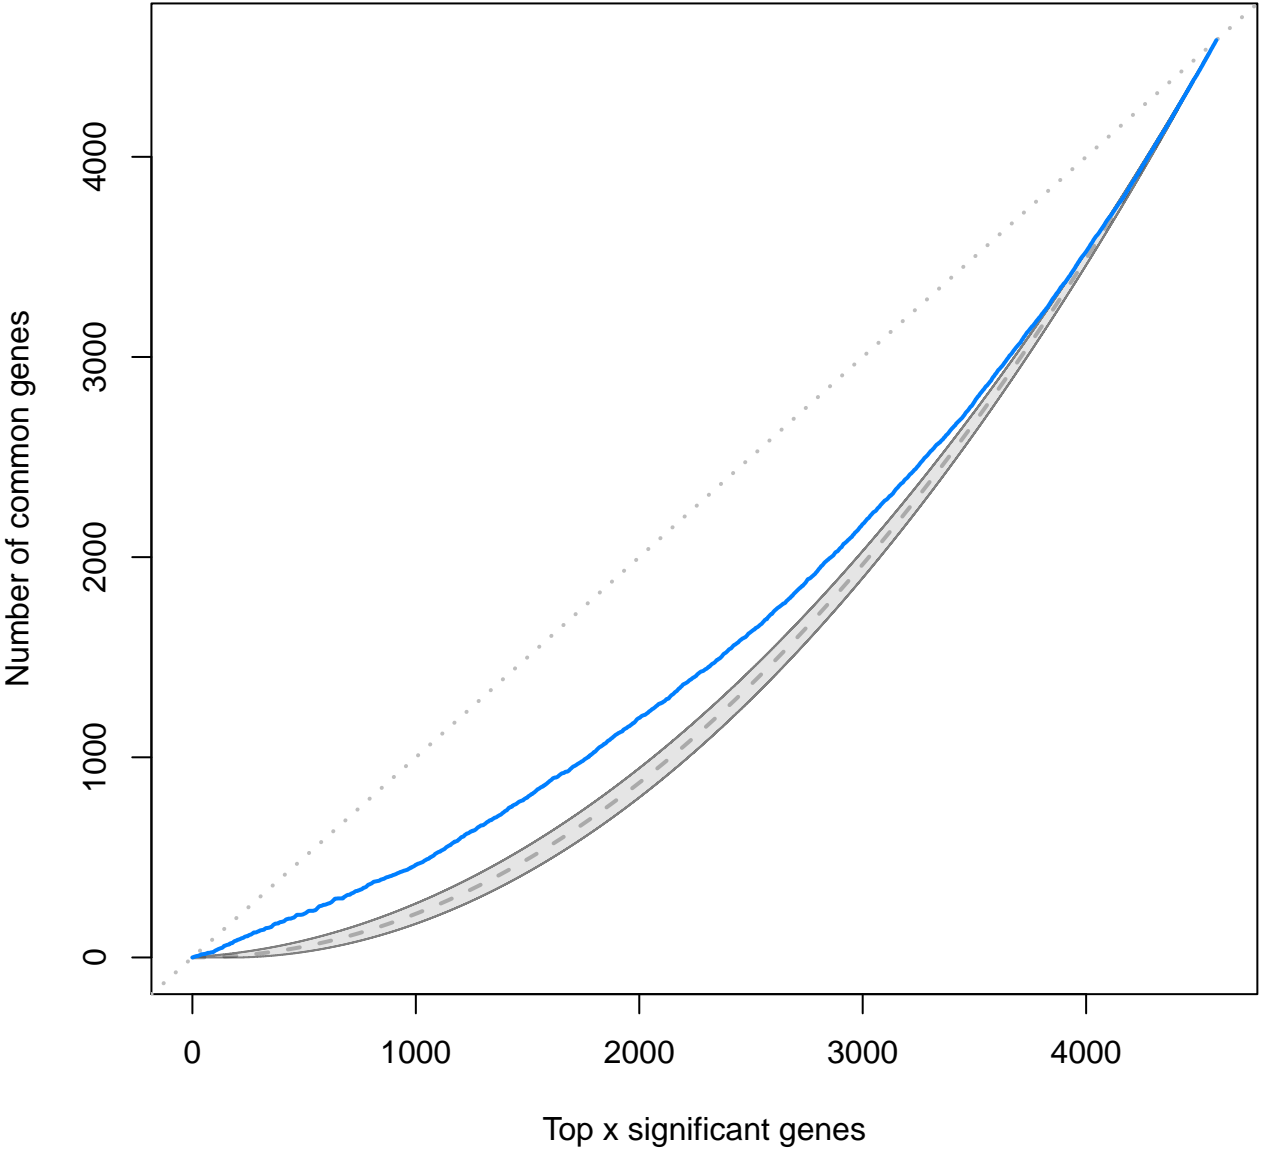

Supplement: 1471-2164-13-596-S2.pdf [file 1471-2164-13-596-S2.pdf]
