# Supplementary material for: A model system for assessing and comparing the ability of exon microarray and tag sequencing to detect genes specific for malignant B-cells
Source: PubMed Central journal article supplement (PMC3505742; doi:10.1186/1471-2164-13-596), 2012-11-05

**A****LM residual plot**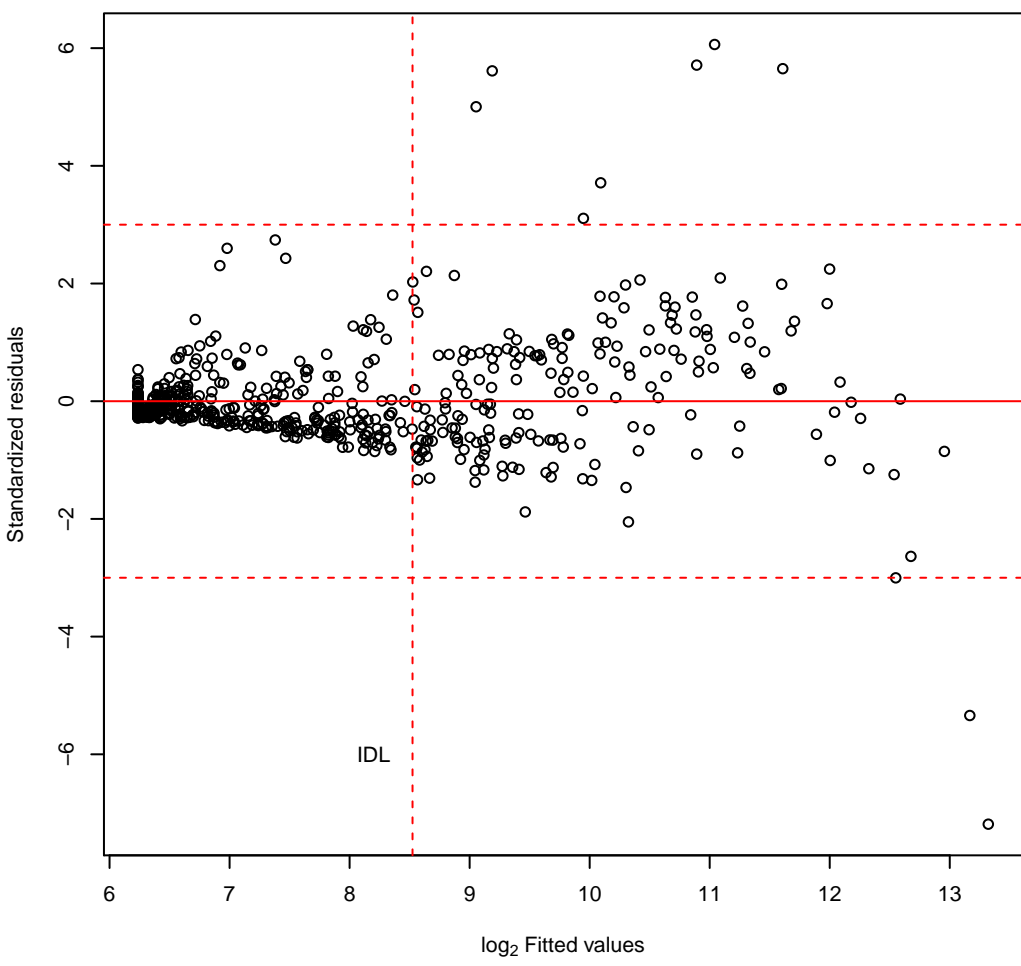**B****LM normal Q-Q plot**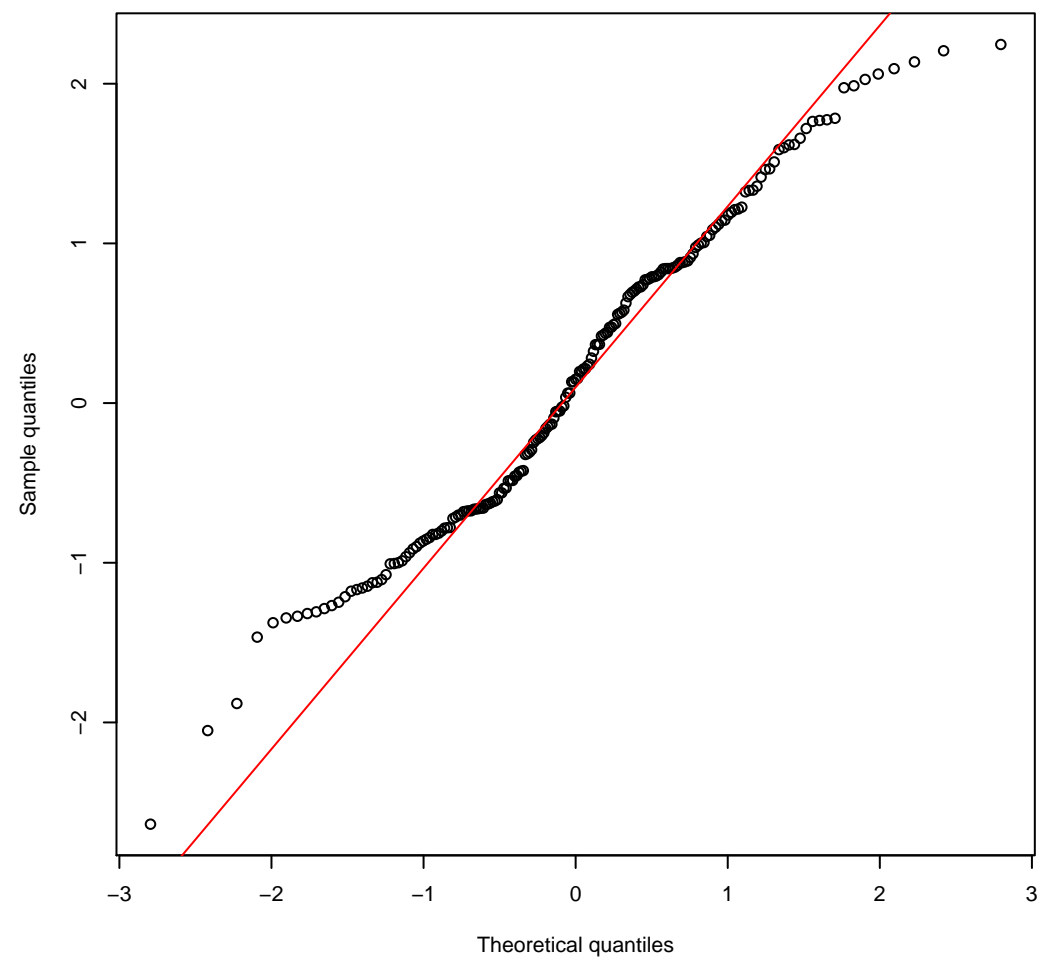**C****NB1 residual plot**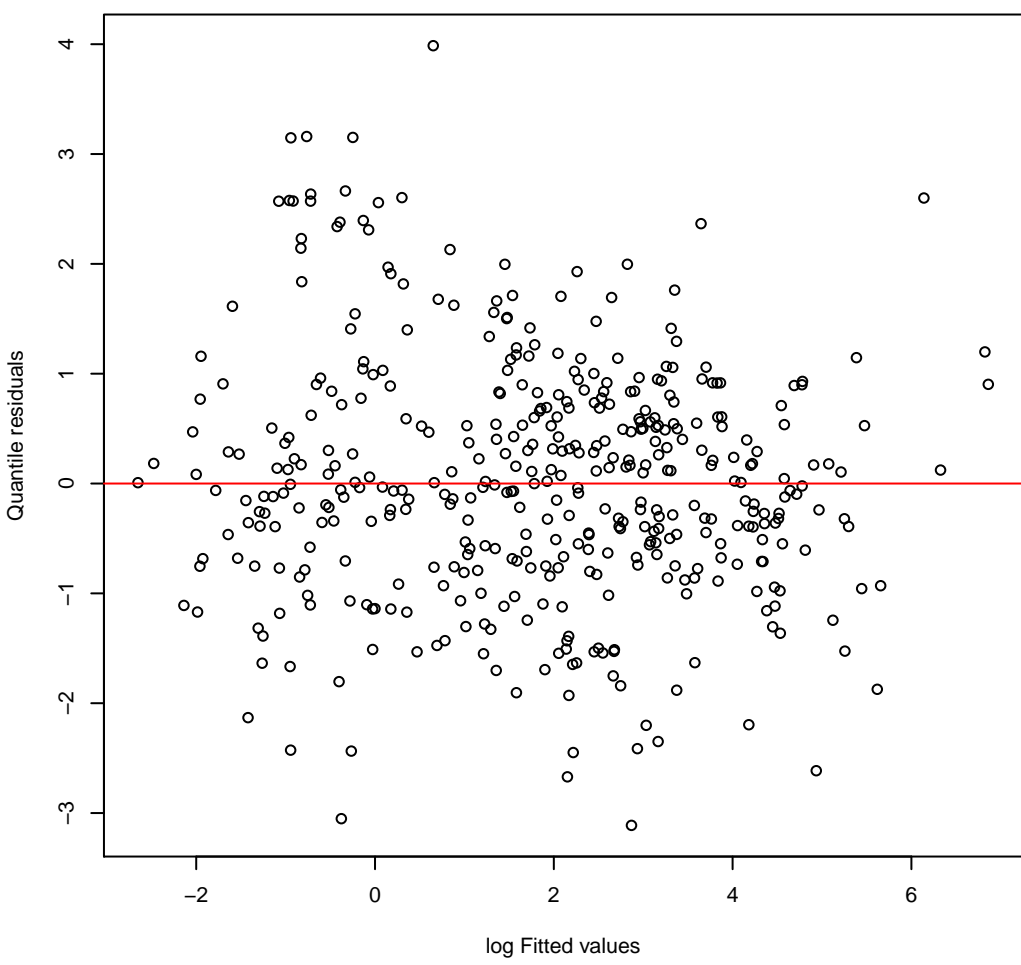**D****NB1 normal Q-Q plot**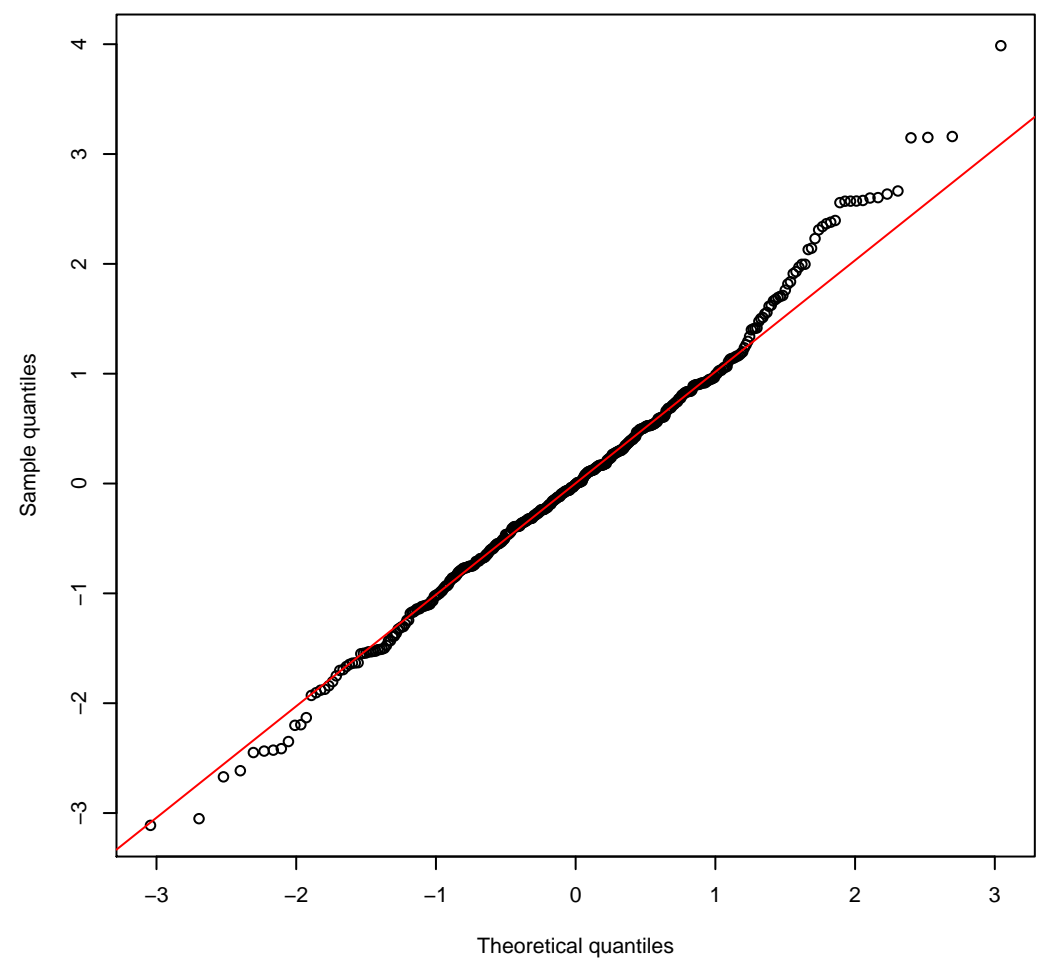**E****NB2 residual plot**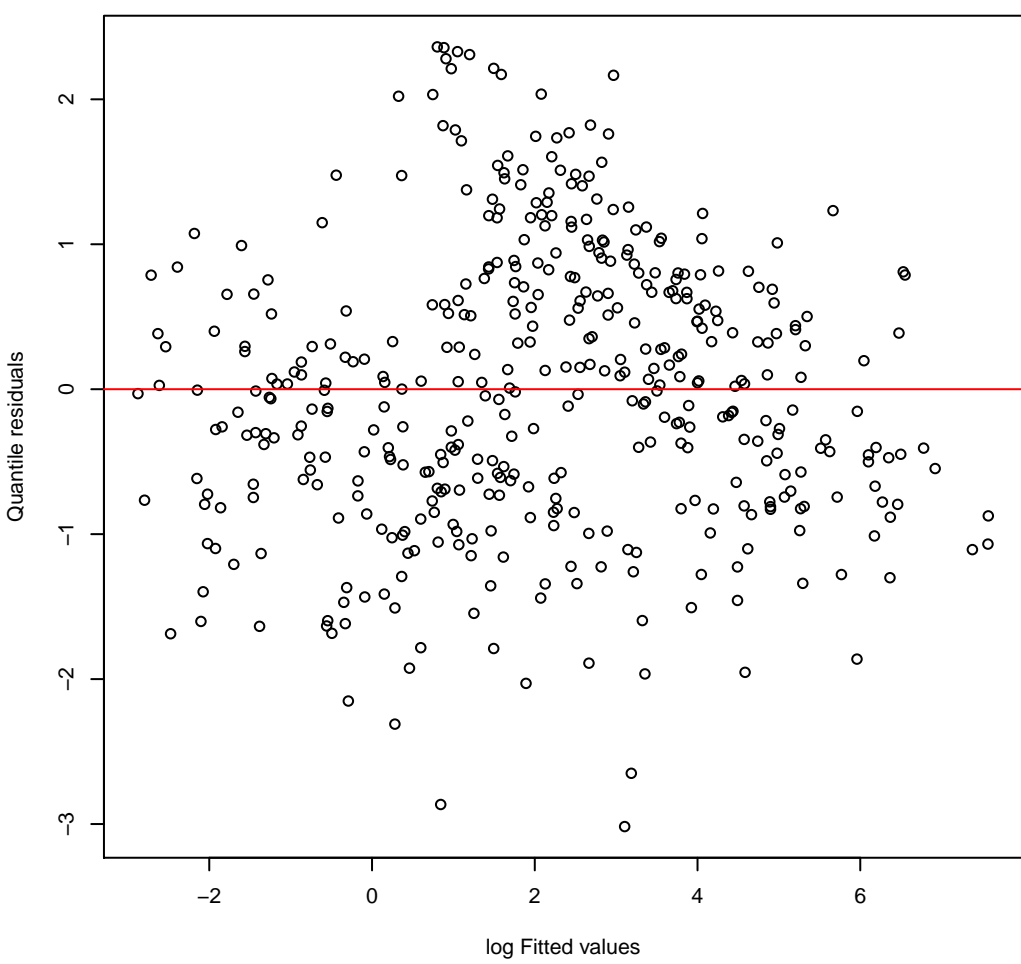**F****NB2 normal Q-Q plot**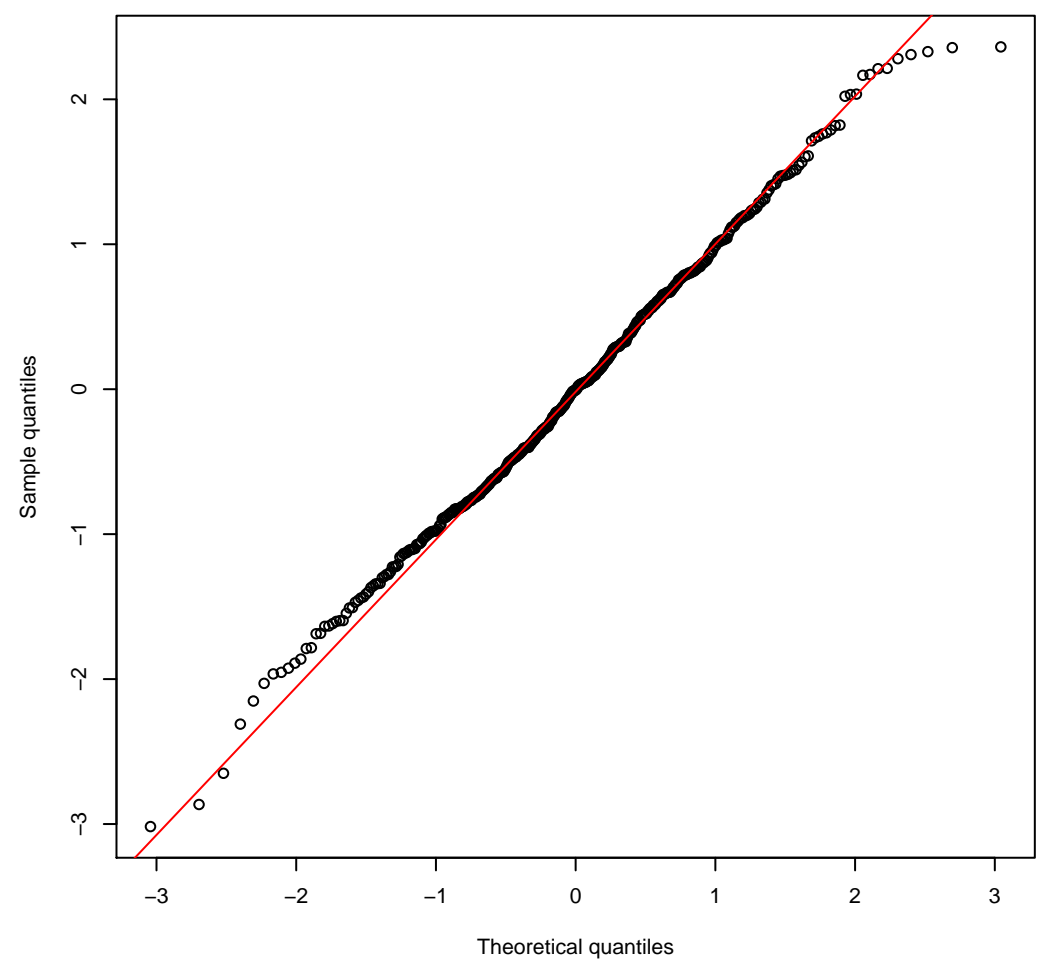

Supplement: 1471-2164-13-596-S6.pdf [file 1471-2164-13-596-S6.pdf]
